# Supplementary material
Source: publisher figshare collection journal article supplement (https://tandf.figshare.com/articles/dataset/_/5594203)

## **Supplementary figure S1 Maximum Likelihood phylogenies**

For each locus a ML tree was built using the best substitution model as defined in MEGA6. These models were JC (Sym32), JC+I (CA2m), T92+ $\Gamma$  (TyrK, RNAbinding5), T92+ $\Gamma$ +I (DUF140). Each allele for each individual is designated in the tree as follows: Site (3 letters, see table 1) + morph (1 letter, see table 1) + individual ID number + allele (a or b).

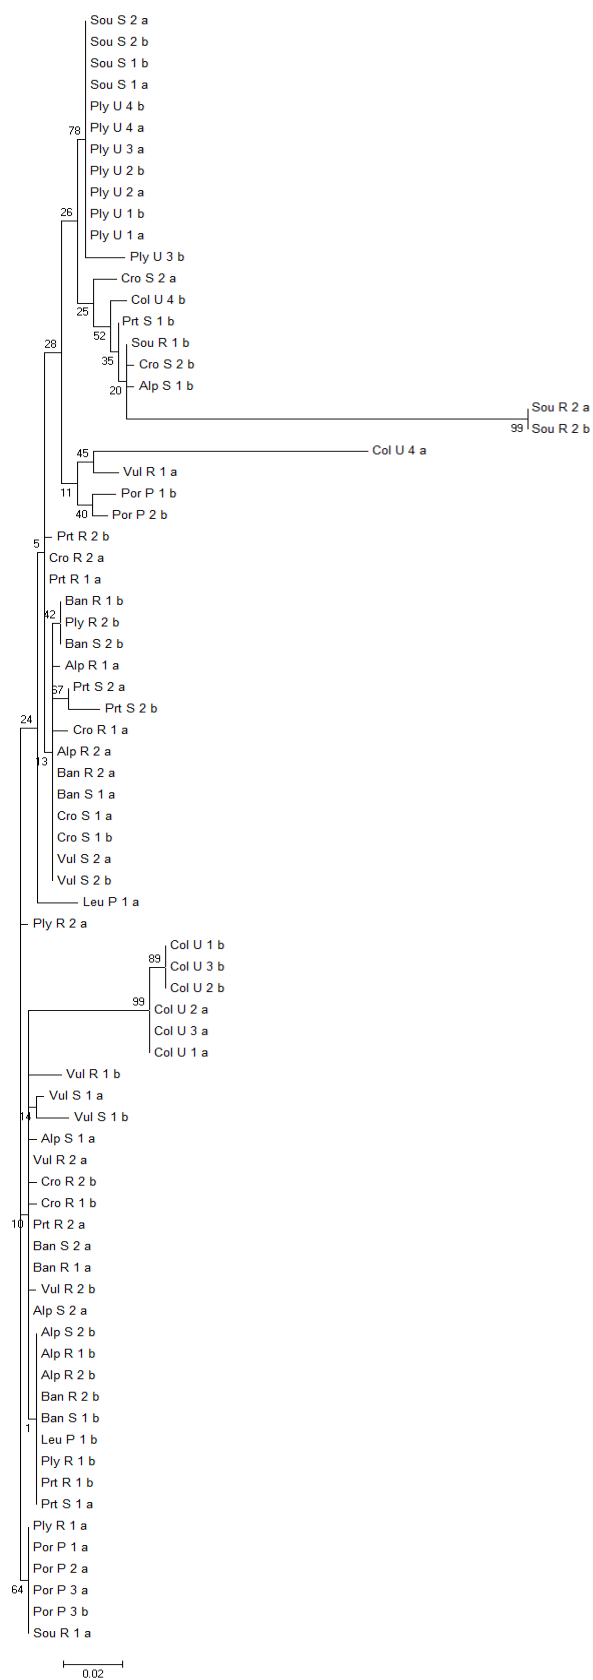

**TyrK**

# DUF140

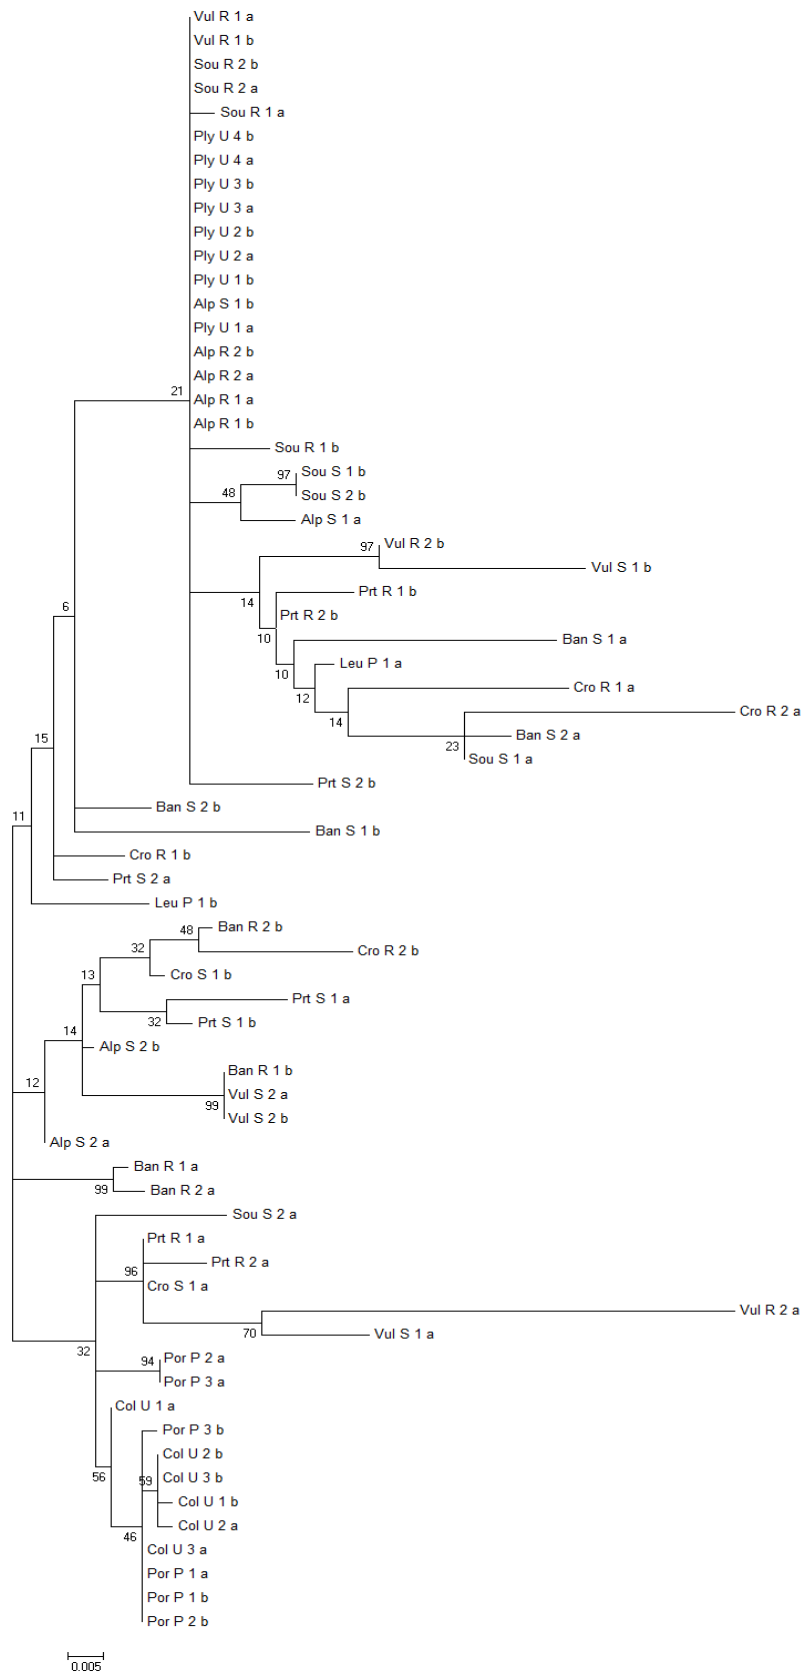

RNAbinding5

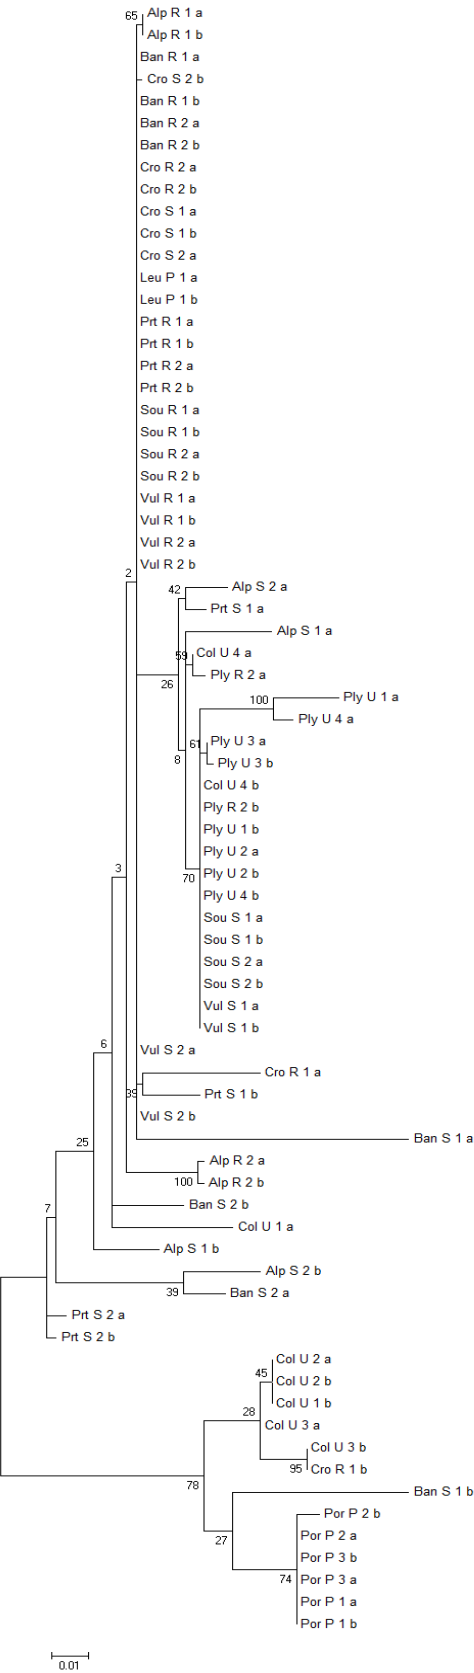

## CA2m

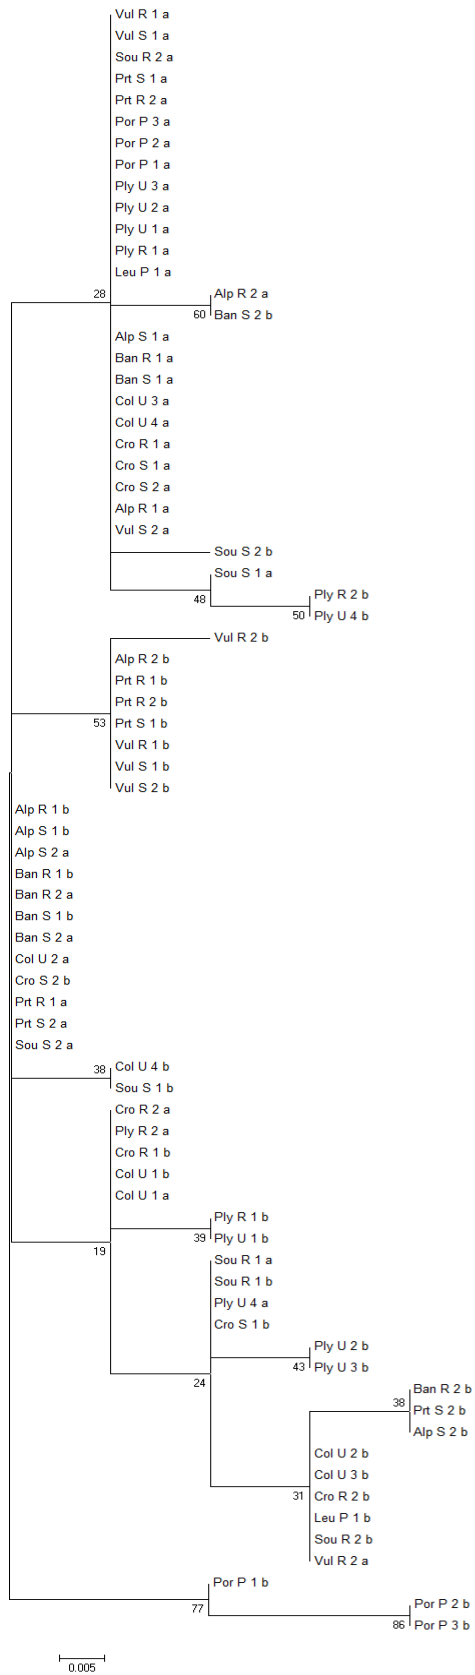

**Sym32**

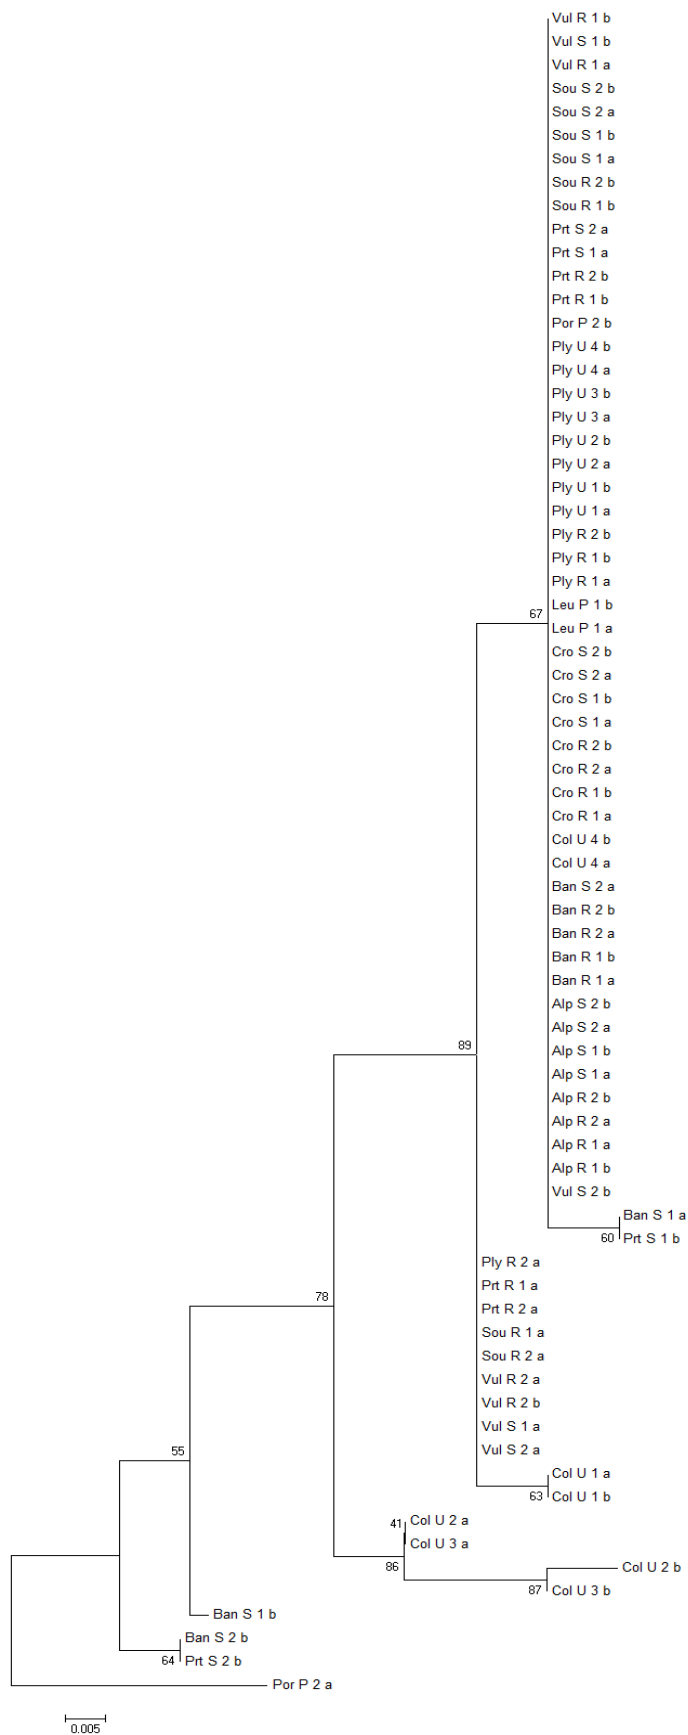

Supplement: Supplementary file 1 [file 1]
